# Supplementary material for: Variable expression levels of keratin and vimentin reveal differential EMT status of circulating tumor cells and correlation with clinical characteristics and outcome of patients with metastatic breast cancer
Source: Springer Nature journal article supplement (doi:10.1186/s12885-015-1386-7), 2015-05-11
Supplement: MOESM2 [file 9744554]

Additional file 2

Title: Mesenchymal/epithelial ratios in breast cancer cell lines

Description: The range and mean values ( $\pm$  SD) were calculated by measuring the fluorescence intensity (CTCF/area) of each marker. For the calculation of vimentin/EpCAM and Fibronectin/K ratios, data were obtained from double staining (EpCAM and vimentin or K and Fibronectin respectively) immunofluorescence experiment.

|                  |       | <b>Vimentin/EpCAM</b> | <b>Fibronectin/K</b> |
|------------------|-------|-----------------------|----------------------|
| <b>MCF-7</b>     | Range | 0.13 -0.49            | 0.01–0.07            |
|                  | Mean  | 0.26 $\pm$ 0.10       | 0.037 $\pm$ 0.016    |
| <b>T47D</b>      | Range | 0.19-0.57             | 0.01-0.05            |
|                  | Mean  | 0.35 $\pm$ 0.10       | 0.022 $\pm$ 0.009    |
| <b>MBA.MB231</b> | Range | 4.33-51.22            | 7.00-47.00           |
|                  | Mean  | 18.55 $\pm$ 11.36     | 17.12 $\pm$ 11.60    |
| <b>Hs578T</b>    | Range | EpCAM not detectable  | 113.00-304.00        |
|                  | Mean  | EpCAM not detectable  | 206.78 $\pm$ 53.19   |
