# Supplementary material for: Variable expression levels of keratin and vimentin reveal differential EMT status of circulating tumor cells and correlation with clinical characteristics and outcome of patients with metastatic breast cancer
Source: Springer Nature journal article supplement (doi:10.1186/s12885-015-1386-7), 2015-05-11
Supplement: MOESM3 [file 9744554]

Additional file 3 [Additional File3.pdf]

Title: Distribution of various CTC phenotypes in breast cancer patients

Description: Number (No) of CTCs detected in  $10^6$  PBMCs for each patient and their percent distribution in “epithelial”, “intermediate”, “mesenchymal” phenotypes according to their vim/K ratios.

| <b>Patients</b> | <b>No of CTCs</b> | <b>“Epithelial”</b> | <b>“Intermediate”</b> | <b>“Mesenchymal”</b> |
|-----------------|-------------------|---------------------|-----------------------|----------------------|
| P1              | 4                 | 50                  | 50                    | 0                    |
| P2              | 5                 | 80                  | 20                    | 0                    |
| P3              | 12                | 42                  | 58                    | 0                    |
| P4              | 55                | 29                  | 60                    | 11                   |
| P5              | 34                | 70                  | 29                    | 0                    |
